1 **Neural dynamics of semantic categorization in semantic variant of Primary Progressive**  
2 **Aphasia**

3  
4 Running Title:

5 **Brain dynamics of semantic categorization in semantic variant of PPA**

6  
7  
8  
9 V. Borghesani<sup>1</sup>, C. L. Dale<sup>2</sup>, S. Lukic<sup>1</sup>, L. B. N. Hinkley<sup>2</sup>, M. Lauricella<sup>1</sup>, W. Shwe<sup>1</sup>, D. Mizuiri<sup>2</sup>, S.  
10 Honma<sup>2</sup>, Z. Miller<sup>1</sup>, B. Miller<sup>1</sup>, J. F. Houde<sup>3</sup>, M.L. Gorno-Tempini<sup>1,4</sup> & S. S. Nagarajan<sup>2,3</sup>

11  
12 <sup>1</sup> *Memory and Aging Center, Department of Neurology, University of California San Francisco*

13 <sup>2</sup> *Department of Radiology and Biomedical Imaging, University of California San Francisco*

14 <sup>3</sup> *Department of Otolaryngology, University of California San Francisco*

15 <sup>4</sup> *Department of Neurology, Dyslexia Center, University of California, San Francisco, CA*

16  
17  
18 **Corresponding Author**

19 Valentina Borghesani, PhD, [valentina.borghesani@ucsf.edu](mailto:valentina.borghesani@ucsf.edu)  
20 Department of Neurology,  
21 Memory and Aging Center,  
22 University of California San Francisco  
23 675 Nelson Rising Lane, Mission Bay Campus,  
24 San Francisco, CA 94158, USA

25  
26  
27 **Title:** 94 characters

28 **Abstract:** 200 words

29 **Main text:** 4250 words

30 **Tables:** 3

31 **Figures:** 3

32 **Supplementary Figure:** 1

33

34

35 **Abstract**

36

37 Awake humans constantly extract conceptual information from a flow of perceptual  
38 inputs. Category membership (e.g., *is it an animate or inanimate thing?*) is a critical semantic  
39 feature used to determine the appropriate response to a stimulus. Semantic representations  
40 are thought to be processed along a posterior-to-anterior gradient reflecting a shift from  
41 perceptual (e.g., *it has eight legs*) to conceptual (e.g., *venomous spiders are rare*) information.  
42 One critical region is the anterior temporal lobe (ATL): patients with semantic variant primary  
43 progressive aphasia (svPPA), a clinical syndrome associated with ATL neurodegeneration,  
44 manifest a deep loss of semantic knowledge.

45 Here, we test the hypothesis that svPPA patients, in the absence of an intact ATL,  
46 perform semantic tasks by over-recruiting areas implicated in perceptual processing. We  
47 acquired MEG recordings of 18 svPPA patients and 18 healthy controls during a semantic  
48 categorization task. While behavioral performance did not differ, svPPA patients showed  
49 greater activation over bilateral occipital cortices and superior temporal gyrus, and inconsistent  
50 engagement of frontal regions.

51 These findings indicate a pervasive reorganization of brain networks in response to ATL  
52 neurodegeneration: the loss of this critical hub leads to a dysregulated (semantic) control  
53 system, and defective semantic representations are compensated via enhanced perceptual  
54 processing.

55

## 56 Introduction

57

58         Approaching a greenish, twisted object during a countryside walk, you might have two  
59 very different reactions: running away or simply stepping over it. Such a seemingly easy  
60 process, i.e., telling a *snake* from a *rope*, requires the interplay of multiple cognitive processes  
61 relying on different neural substrates. First, the visual input must be analyzed, collecting  
62 information on all possibly relevant motor-perceptual features (e.g., *color*, *sound*, *movement*).  
63 Then, the extracted features must be merged into a unitary concept to allow proper  
64 identification (e.g., *it's a rope*). Finally, one can select and perform an appropriate response  
65 (e.g., *I'll walk by it*). All the neural computations supporting these processes occur within a few  
66 seconds. While the earliest perceptual processing takes place in the occipital cortex, the final  
67 stages (i.e., motor programming and execution) entail activation of frontal-parietal structures.  
68 The critical intermediate steps, involving the transformation from a visual input to a concept  
69 (and its semantic categorization as living vs. nonliving, dangerous vs. harmless), have been  
70 linked to the coordinated activity of multiple neural areas (Clarke & Tyler, 2015). Functional  
71 neuroimaging and neuropsychological research indicate that semantic knowledge is encoded  
72 within distributed networks (Huth, Nishimoto, Vu, & Gallant, 2012; Fernandino et al. 2015),  
73 with a few key cortical regions acting as critical hubs (Lambon-Ralph, Jefferies, Patterson, &  
74 Rogers, 2017). However, many open questions remain as to the nature of neural  
75 representations and computations in these different areas, and how they dynamically interact.

76         Prior functional neuroimaging studies suggested that populations of neurons along the  
77 ventral occipito-temporal cortex (vOT) tune to ecologically relevant categories leading to a  
78 nested representational hierarchy of visual information (Grill-Spector & Weiner, 2014), where  
79 specialized cortical regions respond preferentially to faces (Gauthier et al., 2000; Kanwisher,  
80 McDermott, & Chun, 1997), places (Epstein & Kanwisher, 1998), bodies and body parts (P. E.  
81 Downing, Wiggett, & Peelen, 2007; P. Downing & Kanwisher, 2001), or objects (Lerner, Hendler,  
82 Ben-Bashat, Harel, & Malach, 2001). Living stimuli appear to recruit lateral portions of vOT,  
83 while nonliving stimuli are highlighted in medial regions (Martin & Chao, 2001). Multiple  
84 organizing principles appear to be responsible for the representational organization of these  
85 areas, including agency and visual categorizability (Thorat, Proklova, & Peelen, 2019). Overall,

86 semantic representations appear to be processed in a graded fashion along a posterior-to-  
87 anterior axis: from perceptual (e.g., *snakes are elongated and legless*) to conceptual  
88 information (e.g., *a snake is a carnivorous reptile*) (Borghesani et al., 2016; Peelen & Caramazza,  
89 2012). Notwithstanding this overall distributed view, different areas have been linked with  
90 specific computational roles: from modality-specific nodes in secondary motor and sensory  
91 areas to multimodal convergence hubs in associative cortices (Binder & Desai, 2011).

92         Neuropsychological findings corroborate the idea of a distributed yet specialized  
93 organization of semantic processing in the brain, supported by the interaction of a perceptual  
94 representational system arising along the occipito-temporal pathway, a semantic  
95 representational system confined to the anterior temporal lobe (ATL), and a semantic control  
96 system supported by fronto-parietal cortices (Lambon-Ralph et al., 2017). For instance, focal  
97 lesions in the occipito-temporal pathway are associated with selective impairment for living  
98 items and spared performance on nonliving ones (Blundo, Ricci, & Miller, 2006; Caramazza &  
99 Shelton, 1998; Laiacona, Capitani, & Caramazza, 2003; Pietrini et al., 1988; Sartori, Job, Miozzo,  
100 Zago, & Marchiori, 1993; Warrington & Shallice, 1984) as well as the opposite pattern (Laiacona  
101 & Capitani, 2001; Sacchett & Humphreys, 1992). Moreover, acute brain damage to prefrontal or  
102 temporoparietal cortices in the semantic control system has been linked with semantic aphasia,  
103 a clinical syndrome characterized by deficits in tasks requiring manipulations of semantic  
104 knowledge (Jefferies & Lambon Ralph, 2006).

105         A powerful clinical model to study the organization of the semantic system is offered by  
106 the semantic variant primary progressive aphasia (svPPA or semantic dementia, Hodges et al.,  
107 1992, Gorno-Tempini et al., 2004). This rare syndrome is associated with ATL  
108 neurodegeneration as confirmed by the observation of grey matter atrophy (Collins et al.,  
109 2016), white matter alterations (Galantucci et al., 2011), and hypometabolism (Diehl et al.,  
110 2004), as well as neuropathological findings (Hodges & Patterson, 2007). Patients with svPPA  
111 present with an array of impairments (e.g., single-word comprehension deficits, surface  
112 dyslexia, impaired object knowledge) that can be traced back to a generalized loss of semantic  
113 knowledge, often affecting all stimuli modalities and all semantic categories (Hodges &  
114 Patterson, 2007). Conversely, executive functions and perceptual abilities are relatively

115 preserved. Hence, these patients provide crucial neuropsychological evidence of the role played  
116 by the ATL in the storage of semantic representations, and can be leveraged to investigate the  
117 breakdown of the semantic system and the resulting compensatory mechanisms.

118 Pivotal steps forward in understanding the neurocognitive systems underlying semantic  
119 (as well as any other human) behaviors are enabled by the iterative, systematic combination of  
120 behavioral and neuroimaging data from both healthy controls and neurological patients (Price  
121 & Friston, 2002). However, task-based imaging in patients is hampered by specific difficulties  
122 (e.g., patients' compliance) and limitations (e.g., performance is not matched and error signals  
123 can act as confounds) (Price, Crinion, & Friston, 2006; S. Wilson, Yen, & Eriksson, 2018). To date,  
124 very few studies have attempted to deploy functional imaging in rare clinical syndromes such as  
125 svPPA, thus it is still not fully clear how structural damage and functional alterations relate to  
126 the observed cognitive and behavioral profile. Previous findings suggest that residual semantic  
127 abilities come from the recruitment of homologous and perilesional temporal regions, as well  
128 as increased functional demands on the semantic control system i.e., parietal/frontal regions  
129 (Maguire, Kumaran, Hassabis, & Kopelman, 2010; Mummery et al., 1999; Pineault et al., 2019;  
130 Viard et al., 2013; S. M. Wilson et al., 2009). Recently, magnetoencephalographic imaging  
131 (MEG) has proven useful in detecting syndrome-specific network-level abnormalities  
132 (Ranasinghe et al., 2017; Sami et al., 2018) as well as task-related functional alterations (Kielar,  
133 Deschamps, Jokel, & Meltzer, 2018) in neurodegenerative patients. Critically, it has been  
134 suggested that imperfect behavioral compensation can be achieved via reorganization of the  
135 dynamic activity in the brain (Borghesani et al., 2020): owing to their damage to the ventral,  
136 lexico-semantic reading route, svPPA patients appear to over-recruit the dorsal,  
137 sublexical/phonological pathway to read not only pseudowords, but also irregular ones.

138 Here, we test the hypothesis that svPPA patients, burdened with ATL damage, thus  
139 lacking access to specific conceptual representations, overemphasize perceptual information as  
140 well as overtax the semantic control system to maintain accurate performance on a semantic  
141 categorization task (living vs. nonliving, see Fig. 1a). Given the shallow semantic nature of the  
142 task, we expect comparable performance in patients with svPPA and a group of healthy

143 controls, with the critical differences emerging in neural signatures. Specifically, we expected  
144 patients to over-recruit occipital areas, supporting their greater reliance on visual processing.

145

146

## 147 **Results**

148

149

### 150 Behavioral data and cortical atrophy

151 Behavioral performance during the MEG scan neither differed between the two cohorts  
152 nor between the two stimulus categories. Statistically significant differences were not observed  
153 in reaction times (HC: living:  $826.3 \pm 112.5$ , nonliving:  $856.9 \pm 104.4$ ; svPPA: living:  $869.8 \pm 179.8$ ,  
154 nonliving:  $911.1 \pm 194.45$ ), or accuracy (HC: living:  $84.5 \pm 5.8$ , nonliving:  $80.4 \pm 5.4$ ; svPPA: living:  
155  $80.5 \pm 6.2$ , nonliving:  $79.1 \pm 6$ ). Overall, these results indicate that svPPA patients can perform the  
156 task as proficiently as healthy elders, an expected finding due to the relatively shallow semantic  
157 processing requirements and simple stimuli used in the task (see Fig. 1b).

158 Distribution of cortical atrophy in the svPPA cohort is shown in Figure 1c. Patients  
159 present atrophy in the anterior temporal lobe, involving the temporal pole, the inferior and  
160 middle temporal gyrus. This pattern of neurodegeneration is consistent with their clinical  
161 diagnosis and overall neuropsychological profile (see Table 1).

162

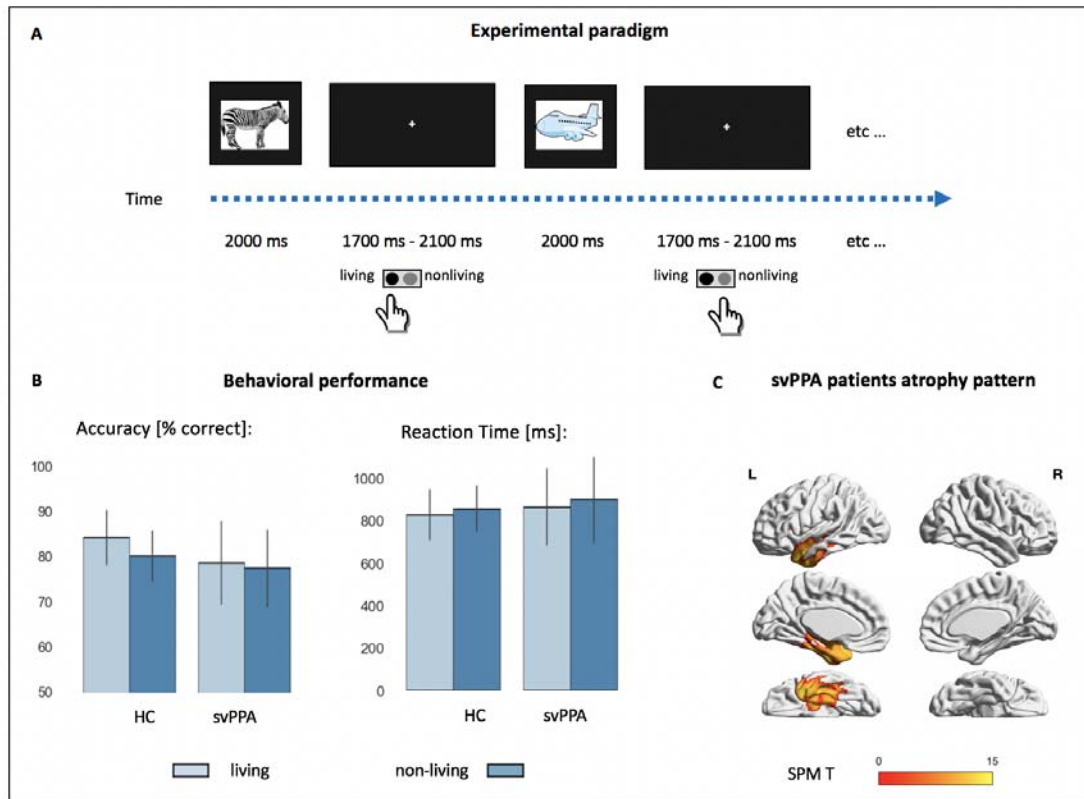

163  
164 **Fig. 1 Experimental paradigm, behavioral performance, and cortical atrophy.** (A) Cartoon representation of the experimental  
165 setting. Colored drawings were presented for 2 seconds, with an inter-stimuli-interval jittered between 1.7 and 2.1 seconds.  
166 Subjects responded with a button press with their dominant hand. (B) Percentage accuracy and reaction times during the  
167 semantic categorization tasks in controls and svPPA patients, across the two stimuli conditions (living vs. nonliving items). (C)  
168 Voxel based morphometry (VBM)-derived atrophy pattern showing significantly reduced grey matter volumes in svPPA  
169 patients' anterior temporal lobes, views from top to bottom shown: lateral, medial, ventral (thresholded at  $p < 0.001$  with family  
170 wise error (FWE) correction).

171

172

### 173 Time course of neural activity during visual semantic categorization

174 Within-group analyses of brain activity during the semantic categorization task, relative  
175 to pre-stimulus baseline activity levels, are presented for both controls and svPPA patients in  
176 Supl. Fig. 1. In brief, following presentation of the images both cohorts showed posterior-to-  
177 anterior progression of functional activation across all five frequency bands. In the high-gamma  
178 band (63-117 Hz), we observed bilateral increases in synchronous power starting in the occipital  
179 cortex and progressively extending to temporal, parietal, and frontal regions (see Supl. Fig. 1a).  
180 In the low-gamma band (30-55 Hz), subjects show heightened synchronization over bilateral  
181 occipital cortices, evident early in the svPPA group and only later in HC. Moreover, both groups  
182 showed reductions in activity over frontal cortices starting mid-trial (see Supl. Fig. 1b). A similar

183 progression of alpha (8-12 Hz) and beta (12-30 Hz) band activity revealed significant reductions  
184 in synchronous activity for both groups, extending from bilateral occipital cortices to temporal  
185 and parietal lobes, and involving progressively larger areas in precentral and superior frontal  
186 gyrus. A focus of increased alpha synchrony in anterior cingulate regions, mid-trial, is evident in  
187 both groups (see Supl. Fig. 1c-d). Finally, induced theta band (3-7 Hz) activity revealed  
188 progressive increases in synchronous activity over bilateral occipital cortices, a similarly  
189 progressive pattern of increased synchronization within frontal regions at an onset window  
190 after that of occipital regions, and progressively reduced theta activity relative to baseline levels  
191 over parietal and temporal lobes (see Supl. Fig. 1e).

192         Taken together, these stimulus-locked task-induced changes indicate, in both cohorts  
193 and across all frequency bands, the expected pattern of visual processing followed by motor  
194 response preparation. Notwithstanding the overall similarity in spatiotemporal dynamics,  
195 specific activation differences were detected between svPPA patients and HC and are reported  
196 below.

197

198



| TABLE 3. Results of MEG contrasts       |             |                    |         |         |
|-----------------------------------------|-------------|--------------------|---------|---------|
| t-test svPPA vs HC                      | Time Window | Local Maxima       |         |         |
|                                         | ms          | MNI [x,y,z]        | p-value | t-value |
| <i>Theta Band [3-7 Hz]</i>              |             |                    |         |         |
| left lingual gyrus                      | 0 - 212     | -10.0 -100.0 -10.0 | 0.005   | 3.7     |
| left lingual gyrus                      | 412 - 612   | -8.5 -100.0 -8.1   | 0.005   | 3.1     |
| right precentral gyrus                  | 62 - 187    | 41.9 -13.6 66.2    | 0.005   | 3.4     |
| right medial and superior frontal gyrus | 187 - 412   | 21.8 64.0 -8.1     | 0.001   | -3.2    |
| <i>Alpha Band [8-12 Hz]</i>             |             |                    |         |         |
| right precentral gyrus                  | 212 - 612   | 45.0 -15.0 40.0    | 0.001   | 3.4     |
| left middle temporal gyrus              | 237 - 362   | -59.8 -41.6 -1.0   | 0.005   | 2.8     |
| left anterior cingulate                 | 462 - 612   | -4.7 35.5 -9.7     | 0.005   | 3.1     |
| left parahippocampal gyrus              | 512 - 612   | -22.5 -49.3 -8.9   | 0.005   | 2.9     |
| <i>Beta Band [12-30 Hz]</i>             |             |                    |         |         |
| left cingulate cortex                   | 0 - 62      | -6.2 -30.3 43.3    | 0.005   | 2.9     |
| left lingual gyrus                      | 87 - 112    | -9.3 -100.5 -13.6  | 0.005   | 2.9     |
| right superior frontal gyrus            | 62 - 137    | 30.3 36.2 47.8     | 0.005   | 3       |
| right medial frontal gyrus              | 137 - 262   | 7.8 56.8 11.7      | 0.001   | 3.6     |
| left middle temporal gyrus              | 237 - 362   | -65.0 -20.0 -5.0   | 0.001   | -3.4    |
| left superior frontal gyrus             | 562 - 612   | -21.8 46.7 45.7    | 0.005   | -3.1    |
| <i>Low Gamma Band [30-55 Hz]</i>        |             |                    |         |         |
| left lingual gyrus                      | 62 - 612    | -10.1 -98.4 -8.9   | 0.001   | 4.2     |
| left inferior occipital gyrus           | 362 - 612   | -34.8 -93.9 2.7    | 0.001   | 4.1     |
| right lingual gyrus                     | 212 - 437   | 18.2 -89.1 8.3     | 0.005   | 3.4     |
| right medial frontal gyrus              | 212 - 412   | 9.3 63.0 2.2       | 0.001   | 3.7     |
| left superior frontal gyrus             | 262 - 462   | -3.8 62.8 14.0     | 0.005   | 3.6     |
| <i>High Gamma Band [63-117 Hz]</i>      |             |                    |         |         |
| left superior frontal gyrus             | 62 - 137    | -36.5 26.6 48.8    | 0.001   | 3.4     |
| left superior temporal gyrus            | 62 - 287    | -48.2 -22.3 13.3   | 0.005   | 3       |
| left parahippocampal gyrus              | 212 - 312   | -15.5 -27.1 -6.5   | 0.001   | 3.3     |
| right medial frontal gyrus              | 287 - 337   | 13.2 70.7 0.6      | 0.005   | 3.2     |
| left superior frontal gyrus             | 287 - 612   | -22 68.4 14        | 0.001   | 3.6     |
| right superior frontal gyrus            | 462 - 612   | 43.9 54.7 17.2     | 0.001   | 3.9     |

199

200

201

202

203

204

205

206

**Table 3. Local maxima in MNI coordinates.** Time window, MNI coordinates, p- and t-value of the local maxima of the different MEG whole-brain contrasts performed. The spatiotemporal distribution of these clusters at 4 exemplar time points can be appreciated in Figure 2.

### Neural dynamics of semantic categorization in a faulty semantic system

207

208

209

210

211

212

213

We investigated when, where, and at which frequency svPPA patients differ from healthy controls during semantic categorization of visual stimuli. While the overall pattern of activation across frequencies and time is similar, crucial differences between the two cohorts emerged in the between-group analyses performed in each frequency band. Table 3 summarizes the temporal windows, peaks of local maxima, and t-values of all clusters isolated by the direct comparison of the two cohorts. Figure 2 allows appreciation of the spatiotemporal distribution of these clusters at 4 exemplar time points.

214

215 In the high-gamma band, we detected significantly higher synchronization in svPPA  
216 patients, relative to controls, over left superior temporal (at both early and late time points)  
217 and right frontal (at late time points) cortices (see Fig. 2a). In the low-gamma band, we  
218 observed an extensive spatio-temporal cluster over bilateral occipital cortices with significantly  
219 higher synchronized activity in svPPA patients relative to controls. Similarly, small clusters of  
220 gamma activity, relatively more desynchronized in HC than svPPA, resulted in an increased  
221 gamma synchrony in medial frontal cortices at ~300 ms for the svPPA group (see Fig. 2b).  
222 Overall, the results at high frequencies (30-117 Hz) suggest thus higher activity in svPPA over  
223 bilateral occipital and left superior temporal cortices throughout the trial, and right frontal  
224 cortices at late time points.

225 Between-group contrast in beta-band revealed, in svPPA patients, more  
226 desynchronization (i.e., more beta suppression) over the left superior temporal gyrus at ~300  
227 ms, while simultaneously displaying less desynchronization in a right middle-frontal cluster (see  
228 Fig. 2c). In the alpha-band, svPPA patients showed less desynchronization over left middle  
229 temporal gyrus at ~300 ms as well as in later clusters in the right precentral gyrus, left anterior  
230 cingulate, and left parahippocampal gyrus (see Fig. 2d). Finally, in the theta band significant  
231 differences over the left occipital cortex occurred at both early (~100 ms) and late (~500 ms)  
232 time points indicating higher synchronization in svPPA patients compared to HC, while the  
233 opposite pattern (i.e., higher activity for HC) is observed in a right frontal cluster at ~300ms (see  
234 Fig. 2e). Overall, the results at low frequencies (3-30 Hz) suggest thus higher activity in svPPA  
235 over bilateral occipital and left superior temporal cortices, while indicating less activity in left  
236 middle-temporal and right frontal regions.

237 Taken together, these findings suggest that svPPA patients performed the semantic  
238 categorization tasks by over-recruiting bilateral occipital cortices and left superior temporal  
239 gyrus, while showing less reliance on left middle-temporal regions and inconsistent  
240 engagement of frontal ones.

241

242

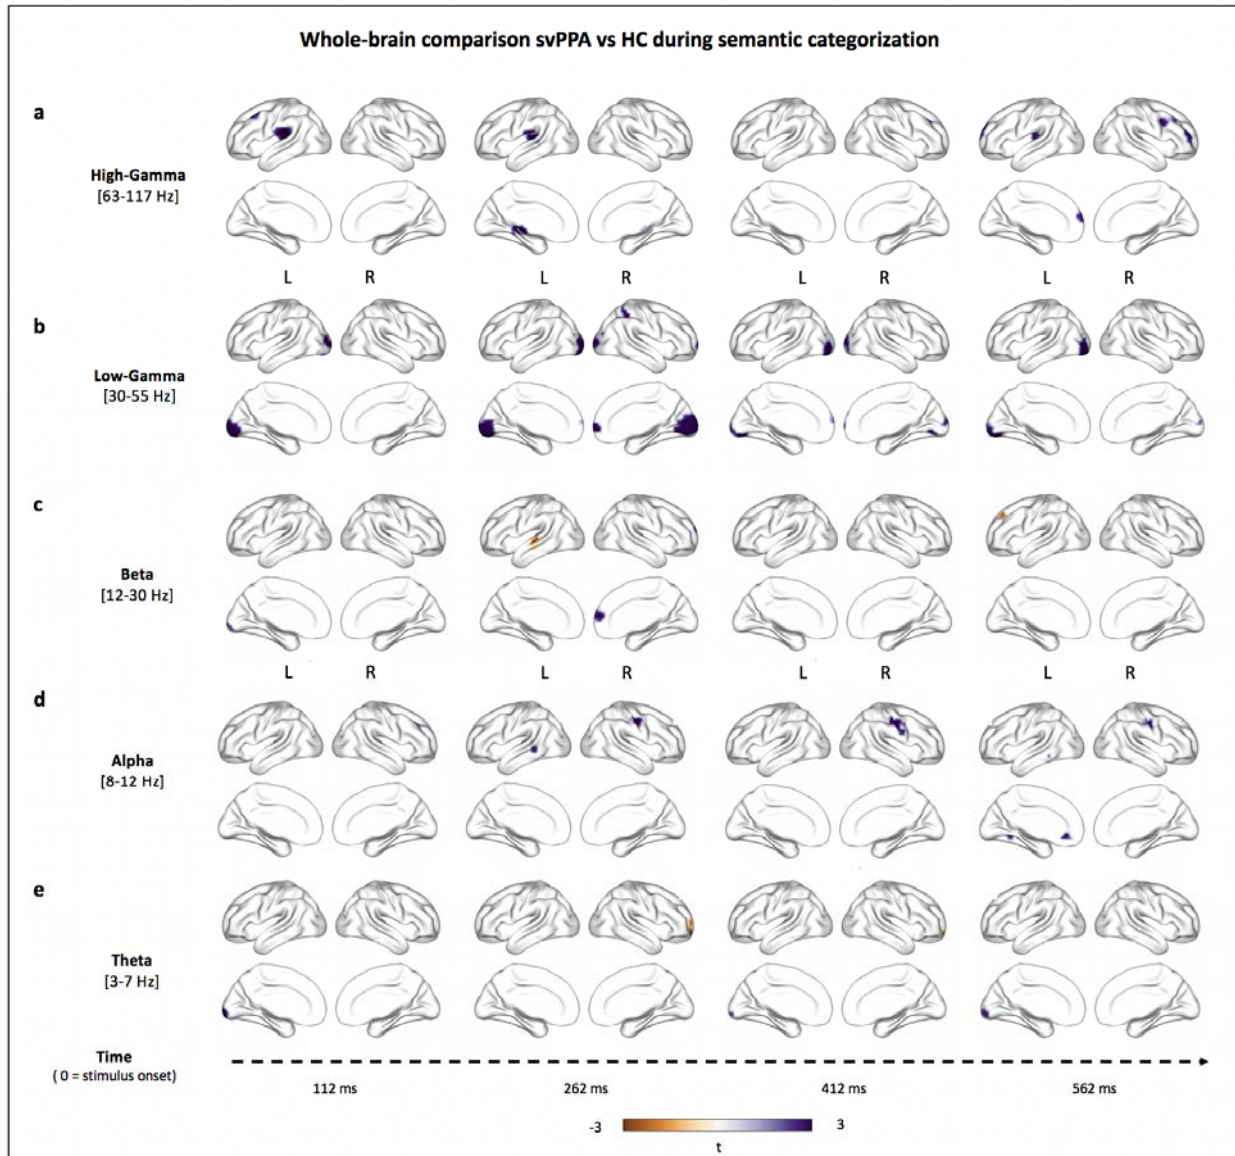

243 **Figure 2. Stimulus-locked (0 ms = stimulus onset) between-group analyses of changes in oscillatory power.** Rendering of the  
244 results in the high-gamma (a), low-gamma (b), beta (c), alpha (d) and theta (e) bands. Purple color = more synchronization in  
245 svPPA (vs. HC). Brown color = less synchronization in svPPA (vs. HC). Table 3 summarizes the temporal windows, peaks of local  
246 maxima, and t-values of all clusters isolated by the direct comparison of the two cohorts.

247

### 248 Occipital gamma synchronization correlates with reaction times in svPPA

249 As illustrated in Fig. 3, our region-of-interest (ROI) post-hoc analysis suggests a linear  
250 relation between occipital gamma synchronization and RTs in svPPA patients ( $r = -0.5$ ,  $p = 0.04$ ),  
251 an effect not seen in healthy controls ( $r = 0.18$ ,  $p = 0.48$ ). Neither of the cohorts show a

252 significant correlation between STG beta suppression and RTs (svPPA:  $r = 0.04$ ,  $p = 0.86$ , HC:  $r =$   
253  $-0.2$ ,  $p = 0.45$ ).

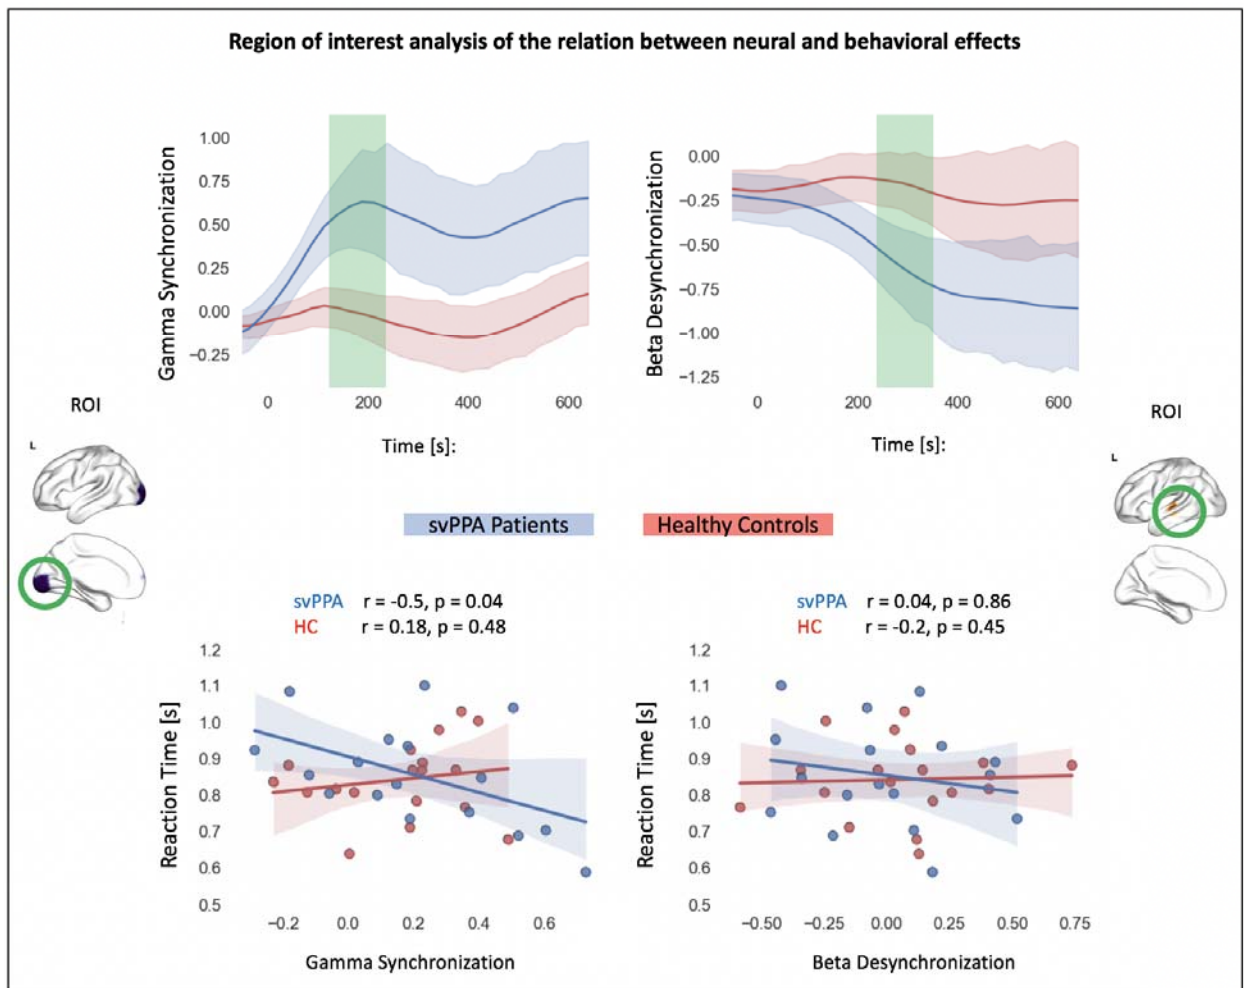

254  
255 **Figure 3. Results of the region of interest post-hoc analysis correlating reaction times and beta/gamma activity.** Two ROIs  
256 were centered on the main clusters resulting from the contrast svPPA patients vs. healthy controls in the gamma band (left) and  
257 in the beta band (right) in the 100ms window surrounding the peak effect.

## 258 259 Discussion

260  
261 This is the first study investigating the spatiotemporal dynamics of semantic  
262 categorization of visual stimuli in a cohort of svPPA patients. We provide compelling evidence  
263 that, burdened with ATL damage, svPPA patients recruit additional perilesional and distal  
264 cortical regions to achieve normal performance on a shallow semantic task. As compared to  
265 healthy age-matched controls, svPPA patients showed greater activation over bilateral occipital  
266 cortices and superior temporal gyrus, indicating over-reliance on perceptual processing and

267 spared dorsal language networks. Conversely, they showed inconsistent engagement of frontal  
268 regions, suggesting less efficient control responses.

269         These findings have important implications both for current neurocognitive models of  
270 the language systems, and on the utility of MEG imaging in clinical populations. First, the  
271 detection of over-recruitment of occipital and superior-temporal regions paired with  
272 incongruous engagement of frontal ones, speaks to the distributed and dynamic organization of  
273 the semantic system, where semantic representations are supported by occipito-temporal  
274 cortices and semantic control by fronto-parietal ones. Second, the observation that normal  
275 performance can be achieved via altered neural dynamics elucidates the neurocognitive  
276 mechanisms that support compensation in neurological patients. Specifically, we contribute to  
277 the body of literature illustrating how network-driven neurodegeneration leads to the  
278 reorganization of the interplay of various cortical regions.

279

#### 280 Faulty semantic representations: compensating conceptual loss with perceptual information

281         Our key finding is that svPPA patients can achieve normal performance in a shallow  
282 semantic task by over-relying on perilesional language-related regions (STG), as well as on distal  
283 visual (occipital) and executive (frontal) networks. At frequencies spanning low and high gamma  
284 bands, svPPA patients show increased activity in occipital and superior temporal cortices  
285 relative to their healthy counterparts. Gamma oscillations have been associated with local  
286 computations (Donner & Siegel, 2011), promoting unification and binding processes (Hagoort et  
287 al. 2004), including merging of multimodal semantic information (van Ackeren et al., 2014).  
288 Similarly, results at lower frequencies indicate greater neural activity in svPPA over bilateral  
289 occipital and left superior temporal cortices. Theta oscillations have been associated with  
290 operations over distributed networks, such as those required for lexico-semantic retrieval  
291 (Bastiaansen et al., 2005; Bastiaansen et al., 2008; Kiehl et al., 2015) and integration of  
292 unimodal semantic features (van Ackeren et al., 2014). This data also suggests that more  
293 engagement of occipital areas (via increased gamma band activity) is related to better  
294 performance (faster RTs). In our patients, compensation for faulty semantic representations

295 seems thus to rely primarily on local and distributed computations in networks associated with  
296 perceptual processing.

297 In principle, the semantic task employed in the current study (i.e., identifying a visually  
298 presented object as either a living or nonliving) can be performed by focusing on a few key,  
299 distinctive, motor-perceptual features: *if it has eyes and teeth, it is a living being*. Further  
300 processing steps, such as would be required for an object-identification and naming (i.e.,  
301 accessing the appropriate lexical label), require the integration of multiple motor-perceptual as  
302 well as conceptual features (Borghesani & Piazza, 2017): *a python is a nonvenomous snake that*  
303 *kills by constriction*. Combining the behavioral data collected during the recordings and outside  
304 and the scanner, it appears clear that HC can recognize (and likely inevitably mentally name)  
305 each item, while svPPA patients can only provide the categorical label. Patient data is thus  
306 critical in characterizing the division of labor between the distributed set of cortical regions  
307 involved in semantic processing. Our findings strongly suggest that ATL damage hampers  
308 operation of the semantic representation system, by shattering their conceptual components  
309 and thus forcing over-reliance on perceptual features coded in posterior cortices. This is  
310 consistent with a growing body of research. For instance, it has been shown that the ability to  
311 merge perceptual features into semantic concepts relies on the integrity of the ATL (Hoffman,  
312 Evans, & Lambon Ralph, 2014), and that ATL damage promotes reliance on perceptual  
313 similarities over conceptual ones (Lambon-Ralph, Sage, Jones, & Mayberry, 2010). Moreover, it  
314 appears that the more motor-perceptual information is associated with a given concept, the  
315 more resilient it is to damage, an advantage that is lost once the disease progresses from ATL to  
316 posterior ventral temporal regions (Hoffman, Jones, & Ralph, 2012).

317

### 318 Faulty semantic representations: overtaxing the semantic control network

319 Compared to healthy controls, svPPA patients appear to have less activation in the left  
320 middle-temporal gyrus and to inconsistently engage frontal regions, suggesting that increased  
321 demands to the semantic control systems are met by inefficient responses in prefrontal and  
322 superior frontal cortices. Comparing the two cohorts across frequency bands, it appears that an  
323 enhanced late high frequency (local neural) response occurs in svPPA, versus an earlier and

324 lower frequency (long range connection) response in controls. One speculation for this pattern  
325 is that in svPPA an initial inefficient response in the (semantic) cognitive control network  
326 centered on frontal areas leads to a later higher reliance on local activity for (semantic)  
327 cognitive control and decision-making processes.

328         Previous studies demonstrated that object recognition in visual areas is facilitated by  
329 prior knowledge (Bannert & Bartels, 2013) received via feedback projections from both frontal  
330 (Bar et al., 2006) and anterior temporal (Coutanche & Thompson-Schill, 2015) cortices.  
331 Moreover, it has been observed that higher demands for feature integration entail more  
332 recurrent activity between fusiform and ATL (Clarke, Taylor, & Tyler, 2011). Our study provides  
333 a direct contrast between subjects in which both frontal and ATL feedback inputs are preserved  
334 (HC), and those in which ATL neurodegeneration forces reliance exclusively on frontal inputs.

335         Interestingly, the observed temporal dynamics (with the detection of early frontal  
336 involvement) are not compatible with a strictly feedforward model of visual stimuli processing.  
337 This is in line with recent evidence that recurrent neural models are needed to explain the  
338 representational transformations supporting visual information processing (Gwilliams & King,  
339 2019; Kietzmann, Spoerer, Sörensen, Cichy, & Hauk, 2019).

340         Thus, taken together, our findings corroborate the idea that the conversion from  
341 percept to concept is supported by recurrent loops over fronto-parietal and occipito-temporal  
342 regions which have been implicated in, respectively, semantic control and semantic  
343 representations (Chiou, Humphreys, Jung, & Lambon Ralph, 2018).

#### 344 345 Clinical implications

346         Our findings corroborate the idea that neurodegeneration leads to the dynamic  
347 reorganization of distributed networks (Agosta et al., 2014; Guo et al., 2013), and that task-  
348 based MEG imaging can be instrumental in deepening our understanding of the resulting  
349 alterations (Borghesani et al., 2020). Ultimately, these efforts will pave the way towards  
350 treatment options, as well as better early diagnostic markers as functional changes are known  
351 to precede structural ones (Bonakdarpour et al., 2017). For instance, our results support  
352 previous neuropsychological evidence suggesting that the origin of svPPA patients' difficulties  
353 during semantic categorization tasks are linked to degraded feature knowledge rather than, as

354 it happens in other FTDs, to a deficit of the executive processes involved (Koenig, Smith, &  
355 Grossman, 2006).

356 Our results are in line with prior studies relating svPPA patients' performance on  
357 semantic tasks with respect to not only the expected hypoactivation of the left ATL and  
358 functionally connected left posterior inferior temporal lobe (Mummery et al., 1999), but also  
359 based on the patterns of hyperactivations observed in the current study. Heightened activity  
360 has been reported in peritrophic left anterior superior temporal gyrus as well as more distant  
361 left premotor cortex, and right anterior temporal lobe (Mummery et al., 1999; Pineault et al.,  
362 2019). Individual subject analyses have indicated that patients might attempt different  
363 compensatory strategies, which may vary in terms of efficiency and, crucially, would rely on the  
364 recruitment of different cortical networks (Viard et al., 2013, 2014). For instance, studies on  
365 reading have associated svPPA patients' imperfect compensation of the semantic deficit  
366 (leading to regularization errors) with over-reliance on parietal regions subserving sub-lexical  
367 processes (Wilson et al., 2009). Consistently, task-free studies of intrinsic functional networks  
368 suggest that the downregulation of damaged neurocognitive systems can be associated with  
369 the upregulation of spared ones. In svPPA patients, recent fMRI evidence shows coupling of  
370 decreased connectivity in the ventral semantic network with increased connectivity in the  
371 dorsal articulatory-phonological one (Battistella et al., 2019; Montembeault et al., 2019).  
372 Additionally, svPPA has been linked with specific spatiotemporal patterns of neuronal  
373 synchrony alterations: alpha and beta hyposynchrony in the left posterior superior temporal  
374 and adjacent parietal cortices, and delta-theta hyposynchrony in left posterior  
375 temporal/occipital cortices (Ranasinghe et al., 2017). Our findings also align with the recent  
376 observation that, during reading, svPPA patients can (imperfectly) compensate for their  
377 damage to the ventral route by over-recruiting the dorsal one (Borghesani et al., 2020). The  
378 present findings corroborate thus the idea that neurodegeneration forces the reorganization of  
379 the interplay between ventral and dorsal language networks.

380 Critically, the present functional neuroimaging results and their interpretation rest on  
381 the fact that the task allowed engagement of semantic processing in patients in which the  
382 semantic system is, by definition, compromised. Contrary to a more challenging task such as



383 naming, patients with svPPA were able to perform the semantic categorization as accurately  
384 and fast as healthy controls. Hence, probing the semantic system at the proper level of  
385 difficulty (Wilson et al., 2018), we avoided the challenging interpretation of activation maps  
386 associated with failure to perform a task (Price et al., 2006). Our findings thus call for caution  
387 when evaluating studies comparing clinical cohorts based solely on behavioral data: failing to  
388 detect a difference in performance does not necessarily correspond to similar underlying  
389 neurocognitive resources.

390

### 391 Limitations and future perspectives

392 The nature of the clinical model we adopted constrains our sample. First, even if ours is  
393 the to-date largest cohort of svPPA patients assessed with task-based functional neuroimaging,  
394 our sample size is relatively small, owing to the rareness of the disease. We thus have limited  
395 statistical power, preventing us from, for instance, further exploring brain-behavior  
396 correlations. Second, our subjects (both healthy controls and patients) are older than those  
397 reported in previous studies on semantic categorization, cautioning against direct comparisons.  
398 While it has been shown that the neural dynamics of visual processing are affected by aging,  
399 the reduced and delayed activity observed does not necessarily relate to poorer performance,  
400 but rather may be mediated by task difficulty (Bruffaerts et al., 2019). Moreover, previous  
401 evidence suggests that even if semantic processing remains intact during aging, its  
402 neurofunctional organization undergoes changes. For instance, (Lacombe, Jolicoeur, Grimault,  
403 Pineault, & Joubert, 2015) found that, during a verbal semantic categorization task, older adults  
404 exhibited behavioral performance equivalent to that of young adults, but showed less  
405 activation of the left inferior parietal cortex and more activation of bilateral temporal cortex.  
406 Finally, our task design does not allow further investigation of potential categorical effects.  
407 Future studies wishing to investigate representations of living and nonliving items separately  
408 will require more trials and stimuli carefully controlled for psycholinguistic variables such as  
409 prototypicality and familiarity. Contrary to patients with damage to the ventral occipito-  
410 temporal cortex due to stroke or herpes simplex encephalitis, svPPA patients usually do not  
411 present categorical dissociations (Moss, Rodd, Stamatakis, Bright, & Tyler, 2005). However,  
412 deeper investigations of time-resolved neural activity in svPPA could shed light onto the debate

413 on the nature of ATL representations: category-specific deficits might arise from lacunar (rather  
414 than generalized) impairment of graded representations (Lambon Ralph, Lowe, & Rogers,  
415 2007).

## 416 417 Conclusions

418 Combining task-based MEG imaging and a neuropsychological model, we provide novel  
419 evidence that faulty semantic representations following ATL damage can be partially  
420 circumvented by additional processing in relatively spared occipital and dorsal stream regions.  
421 Our results thus inform current neurocognitive models of the semantics system by  
422 corroborating the idea that it relies on the dynamic interplay of distributed functional neural  
423 networks. Moreover, we highlight how MEG imaging can be leveraged in clinical populations to  
424 study compensation mechanisms such as the recruitment of perilesional and distal cortical  
425 regions.

## 426 427 **Materials and methods**

### 428 429 Subjects

430 Eighteen svPPA patients (13 female,  $66.9 \pm 6.9$  years old) and 18 healthy age-matched  
431 controls (11 female,  $71.3 \pm 6.1$  years old) were recruited through the University of California  
432 San Francisco (UCSF) Memory and Aging Center (MAC). All subjects were native speakers, and  
433 had no contraindications to MEG. Patients met currently published criteria as determined by a  
434 team of clinicians based on a detailed medical history, comprehensive neurological and  
435 standardized neuropsychological and language evaluations (Gorno-Tempini et al., 2011).  
436 Besides being diagnosed with svPPA, patients were required to score at least 15 out of 30 on  
437 the Mini-Mental Status Exam (MMSE; Folstein, Folstein, & McHugh, 1975) and be otherwise  
438 sufficiently functional to be scanned. Healthy controls were recruited from the University of  
439 California San Francisco Memory and Aging Center (UCSF MAC) healthy aging cohort, a  
440 collection of subjects with normal cognitive and neurological exam and MRI scans without  
441 clinically evident strokes. Inclusion criteria required the absence of any psychiatric symptoms or  
442 cognitive deficits (i.e., Clinical Dementia Rating - CDR = 0, and MMSE  $\geq 28/30$ ). Demographic

443 information and neuropsychological data are shown in Table 1. The study was approved by the  
444 UCSF Committee on Human Research and all subjects provided written informed consent.  
445

446 **Table 1 Demographics and neuropsychological profiles.** Healthy controls and semantic variant of Primary Progressive Aphasia  
 447 (svPPA) patients, native English speakers, were matched for age, gender and education. Scores shown are mean (standard  
 448 deviation). \* indicate values significantly different from controls (P<0.05). MMSE = Mini-Mental State Exam; CDR = Clinical  
 449 Dementia Rating; PPVT = Picture Vocabulary Test; WAB = Western Aphasia Battery; VOSP = Visual Object and Space Perception  
 450 Battery.

| <b>TABLE 1. Demographics and neuropsychological profiles</b> |                 |              |
|--------------------------------------------------------------|-----------------|--------------|
|                                                              | <i>Controls</i> | <i>svPPA</i> |
| <i>Demographic</i>                                           |                 |              |
| <i>N</i>                                                     | 18              | 18           |
| Age, mean (SD)                                               | 70.7 ± 6.5      | 67.1 ± 6.2   |
| Education, mean (SD)                                         | 17.5 ± 1.8      | 17.9 ± 3.2   |
| Gender, <i>n</i> female                                      | 12              | 9            |
| Handedness, <i>n</i> right                                   | 15              | 15           |
| MMSE (max 30)                                                | 29.0 ± 1.6      | 24.5 ± 3.8*  |
| CDR score                                                    | 0.03 ± 0.1      | 0.7 ± 0.4*   |
| CDR Box score                                                | 0.3 ± 1.2       | 4.0 ± 2.6*   |
| <i>Language Production</i>                                   |                 |              |
| Boston (object) naming test (15)                             | 14.7 ± 0.6      | 5.4 ± 3.7*   |
| Phonemic (D-letter) fluency                                  | 15.7 ± 5.8      | 9.1 ± 4.3*   |
| Semantic (animal) fluency                                    | 23.4 ± 3.9      | 9.3 ± 4.1*   |
| <i>Language Comprehension</i>                                |                 |              |
| PPVT (max 16)                                                | ---             | 9.4 ± 3.2    |
| WAB Auditory Word Recognition (60)                           | ---             | 56.5 ± 4.2   |
| WAB Sequential Command (100)                                 | ---             | 70.7 ± 14.3  |
| Digit Span forwards                                          | 7.1 ± 1.1       | 6.4 ± 1.2    |
| <i>Reading</i>                                               |                 |              |
| Arizona Reading Total (max 36)                               | 35.6 ± 0.5      | 30.5 ± 3.7*  |
| Regular High Frequency Words (9)                             | 9 ± 0.0         | 8.8 ± 0.4    |
| Regular Low Frequency Words (9)                              | 8.9 ± 0.2       | 8.3 ± 1.2    |
| Irregular High Frequency Words (9)                           | 8.9 ± 0.3       | 7.7 ± 0.6    |
| Irregular Low Frequency Words (9)                            | 8.8 ± 0.4       | 5.7 ± 2.3    |
| PseudoWords (18)                                             | 15.8 ± 2.7      | 15.2 ± 2.2   |
| <i>Spelling</i>                                              |                 |              |
| Arizona Spelling Total (max 20)                              | 18.1 ± 1.6      | 13.1 ± 4.0*  |
| Regular High Frequency Words (5)                             | 5 ± 0.0         | 4.4 ± 0.9    |
| Regular Low Frequency Words (5)                              | 4.5 ± 0.6       | 4.1 ± 0.8    |
| Irregular High Frequency Words (5)                           | 4.1 ± 0.9       | 2.1 ± 1.6    |
| Irregular Low Frequency Words (5)                            | 4.5 ± 0.5       | 2.6 ± 1.6    |
| PseudoWords (10)                                             | 8.8 ± 1.3       | 8.1 ± 2.6    |
| Famous Faces- Spontaneous Naming (max 16)                    | 12.4 ± 3.4      | 2.9 ± 2.4*   |
| Famous Faces- Face Recognition (max 20)                      | 18.4 ± 2.0      | 12.8 ± 6.5*  |
| Famous Faces Short Triplets, Pictures (max 10)               | 8.9 ± 1.0       | 6.6 ± 2.4    |
| Famous Faces Short Triplets, Words (max 10)                  | 9.7 ± 0.6       | 7.0 ± 2.0    |
| <i>Working Memory/Executive functions</i>                    |                 |              |
| Digit Span backwards                                         | 5.4 ± 1.1       | 4.5 ± 1.6*   |
| Modified Trials (total time)                                 | 25.3 ± 13.6     | 41.9 ± 23.1* |
| Modified Trials (# of correct lines)                         | 13.2 ± 3.2      | 13.2 ± 3.3   |
| Design Fluency (# of correct designs)                        | 11.7 ± 3.0      | 7.1 ± 3.4*   |
| <i>Visuospatial function</i>                                 |                 |              |
| Benson figure copy (17)                                      | 15.7 ± 0.7      | 15.3 ± 1.0   |
| VOSP Number Location (30)                                    | 9.3 ± 0.9       | 9.0 ± 1.5    |
| <i>Visual memory</i>                                         |                 |              |
| Benson figure recall (17)                                    | 12.1 ± 2.4      | 7.1 ± 4.9*   |

451  
 452  
 453  
 454  
 455

456

457 Stimuli and Experimental Design

458 All subjects performed a semantic judgment task on visually presented stimuli (Figure  
459 1a). Stimuli consisted of 70 colored drawings: 36 belonging to the semantic category of living  
460 items (e.g., animals, plants), and 34 belonging to the semantic category of nonliving items (e.g.,  
461 tools, furniture).

462 To validate the set of stimuli, a behavioral study was conducted on a separate group of  
463 54 age-matched healthy subjects (31 women; 47 right-handed; age = 74.21 years  $\pm$  8.63;  
464 education = 15 years  $\pm$  2.02). First, subjects had to report the most common name for each  
465 drawing (i.e., *"Identify the item in the image: what is the first name that comes to mind?"*). They  
466 were given the possibility of providing a second term if needed (i.e., *"If appropriate, write the  
467 second name that came to mind."*). They were then asked to rate how familiar they are with the  
468 item on a 7-point scale from *"not at all familiar"* to *"very familiar"*. Finally, they were asked  
469 whether the item belongs to the category of living or nonliving items, and to rate how  
470 prototypical for that category the item is (i.e., *"How good is this picture as example of an item  
471 of that category?"*) on a 7-point scale from *"bad example"* to *"good example"*. Data were  
472 collected with Qualtrics software (Qualtrics, Provo, UT, USA. <https://www.qualtrics.com>) and  
473 subjects recruited from the broad pool of subjects enrolled in the above described UCSF MAC  
474 healthy aging cohort. For each stimulus, we calculated the percentage of agreement with our  
475 pre-set categorization, average familiarity, average prototypicality, and then compared the  
476 living and nonliving categories. For living items, the average percentage of agreement with the  
477 assigned category was 96.86%  $\pm$  4.07, the lowest score was 75.93% for the item *"dinosaur"*. For  
478 non-living items, the average percentage of agreement was 99.18%  $\pm$  1.20, the lowest score  
479 was 96.30% for the items *"pizza"* and *"hamburger"*. A two-tailed t-test revealed that the  
480 difference between the two categories was significant ( $p=0.002$ ): the rate of agreement was  
481 higher for nonliving items than for living ones. The average prototypicality of living items was  
482 6.24  $\pm$  0.52 (range 6.74 to 4), while for nonliving items 6.47  $\pm$  0.32 (range 6.85 to 5.19) for  
483 nonliving items. Again, a two-tails t-test revealed a significant difference between the two  
484 categories ( $p=0.032$ ): nonliving items were judged more prototypical of their category than  
485 living ones. As for familiarity, the average for living items was 6.15  $\pm$  0.32 (range 6.8 to 4.81),

486 while for nonliving items was  $6.67 \pm 0.21$  (range 6.91 to 6.02). Even in this case the difference  
487 between the two categories was significant (two-tails t-test,  $p < 0.001$ ): nonliving items were  
488 judged more familiar.

489 Images of the two categories were also compared in terms of visual complexity  
490 (calculated as Shannon entropy via the python package Scikit-Image, <https://scikit-image.org/>).  
491 No significant difference between living ( $3.04 \pm 0.84$ ) and nonliving ( $3.13 \pm 0.96$ ) items  
492 emerged. Finally, we compared stimuli in terms of the length (number of letter), imaginability,  
493 concreteness, and familiarity of their most common lexical label as extracted from the Medical  
494 Research Council (MRC, [http://websites.psychology.uwa.edu.au/school/MRCDatabase/uwa\\_mrc.htm](http://websites.psychology.uwa.edu.au/school/MRCDatabase/uwa_mrc.htm)) Psycholinguistic  
495 Database, and word frequency was extracted from the Corpus of Contemporary American  
496 English (COCA, <https://www.wordfrequency.info/>). Consistent with our online questionnaire,  
497 the only statistically significant differences between the two categories were imaginability  
498 (living:  $613.19 \pm 19.62$ , nonliving:  $596.43.15 \pm 28.08$ ,  $p = 0.03$ ) and familiarity (living:  $498.26 \pm$   
499  $69.32$ , nonliving:  $547.96 \pm 45.82$ ,  $p < 0.001$ ). All the psycholinguistic variables characterizing the  
500 stimuli are shown in Table 2.  
501

502 Visual stimuli were projected into the magnetically shielded MEG scanner room via a  
503 system of mirrors mounted within the scanner room for this purpose, with the final mirror  
504 positioned roughly 24" from the subject's face. Subjects were instructed to classify the pictures  
505 as living or nonliving by pressing one of two response buttons with their dominant hand. Stimuli  
506 were displayed for 2 seconds, with an inter-stimulus interval jittered between 1.7 and 2.1  
507 seconds. A total of 170 trials were presented: each individual stimulus was repeated 2.5 times  
508 in a random order. E-Prime (<https://pstnet.com/products/e-prime/>) was used to present the  
509 stimuli; events from ePrime and the response pad were automatically routed into the imaging  
510 acquisition software and integrated with magnetoencephalographic traces in real time.

511  
512

|                       | <i>Living Items</i> | <i>Nonliving Items</i> |
|-----------------------|---------------------|------------------------|
| N                     | 36                  | 34                     |
| Examples              | <i>fish, flower</i> | <i>scissors, train</i> |
| Frequency (log)       | 3.69 (0.54)         | 3.96 (0.65)            |
| Length (# of letters) | 5.29 (1.58)         | 5.61 (1.84)            |
| Immaginability        | 613.19 (19.62)      | 596.43 (28.08) *       |
| Familiarity (norm)    | 498.26 (69.32)      | 547.96 (45.82) *       |
| Familiarity (quest)   | 6.15 (0.32)         | 6.67 (0.21) *          |
| Concreteness          | 608.27 (16.26)      | 599.10 (25.94)         |
| Cat. Agreement        | 96.86 (4.07)        | 99.18 (1.20) *         |
| Cat. Prototypicality  | 6.24 (0.52)         | 6.47 (0.32) *          |
| Visual Complexity     | 3.04 (0.84)         | 3.13 (0.96)            |

513

514 **Table 2. Psycholinguistic characteristics of the stimuli.** Stimuli consisted of 70 colored drawings illustrating living items (n=36)  
515 or nonliving items (34). Length, Imaginability, Concreteness, and Familiarity (norm) were extracted from the Medical Research  
516 Council (MRC) Psycholinguistic Database searching for the most common label for each item. Similarly, Frequency was  
517 extracted from the Corpus of Contemporary American English (COCA). Category Agreement, Category prototypicality, and  
518 Familiarity (quest.) were assessed with a behavioral study on separate age-matched healthy controls. As a proxy for Visual  
519 Complexity, we used Shannon entropy as computed with Scikit-Image. Values shown are mean (standard deviation). \* indicate  
520 values significantly different between the two categories (two-tailed t-test,  $p < 0.05$ ).

521

## 522 Behavioral analyses

523 Subject performance, i.e. reaction times (RTs) and accuracy, was analyzed using an  
524 analysis of variance (ANOVA) based on the two stimuli categories (living vs. nonliving) and two  
525 cohorts (controls vs. svPPA patients) using the Python statistical library (statsmodels -  
526 [www.statsmodels.org](http://www.statsmodels.org)). Data from one outlier in the svPPA cohort were excluded from the  
527 behavioral analyses (average reaction times were 1.35 s versus 0.8 ms in the whole cohort).

528

## 529 MRI protocol and analyses

530 Structural T1-weighted images were acquired on a 3T Siemens system (Siemens,  
531 Erlangen, Germany) installed at the UCSF Neuroscience Imaging Center, equipped with a  
532 standard quadrature head coil with sequences previously described (Mandelli et al., 2014). MRI  
533 scans were acquired within 1 year of the MEG data acquisition.

534

535 To identify regions of atrophy, svPPA patients were compared to a separate set of 25  
536 healthy controls collected using the same protocol (14 females, mean age  $66.2 \pm 8.5$ ) via voxel-  
537 based morphometry (VBM). Image processing and statistical analyses were performed using  
538 the VBM8 Toolbox implemented in Statistical Parametric Mapping (SPM8, Wellcome Trust  
Center for Neuroimaging, London, UK, <http://www.fil.ion.ucl.ac.uk/spm>) running under Matlab

539 R2013a (MathWorks). The images were segmented into grey matter, white matter, and CSF,  
540 bias corrected, and then registered to the Montreal Neurological Institute (MNI). Grey matter  
541 value in each voxel was multiplied by the Jacobian determinant derived from the spatial  
542 normalization to preserve the total amount of grey matter from the original images. Finally, to  
543 ensure the data are normally distributed and compensate for inexact spatial normalization, the  
544 modulated grey matter images were smoothed with a full-width at half-maximum (FWHM)  
545 Gaussian kernel filter of 8x8x8 mm. A general linear model (GLM) was then fit at each voxel,  
546 with one variable of interest (group), and three confounds of no interest: gender, age,  
547 education, and total intracranial volume (calculated by summing across the grey matter, white  
548 matter and CSF images). The resulting statistical parametric map (SPM) was thresholded at  
549  $p < 0.001$ , with family wise error (FWE) correction, and a cluster extent threshold of 100 voxels.  
550 This SPM was additionally used as a binarized image of atrophy to act as an exclusive mask for  
551 the MEG source reconstruction results visualization (see below).

552

### 553 MEG protocol and analyses

554 Neuromagnetic recordings were conducted using a whole-head 275 axial gradiometer  
555 MEG system (Omega 2000, CTF, Coquitlam, BC, Canada) at a sampling rate of 1200 Hz, under a  
556 bandpass filter of 0.001 to 300 Hz, while subjects performed the task. Subjects were lying  
557 supine, with their head supported near the center of the sensor array. Head position was  
558 recorded before and after each scan using three fiducial coils (nasion, left/right preauricular)  
559 placed on the subject. All subjects included in the current study reported movement under 5  
560 mm during the experimental run. Twenty-nine reference sensors were used to correct distant  
561 magnetic field disturbance by calculating a synthetic 3rd order gradiometer (Weinburg et al.,  
562 1984; Vrba and Robinson, 2001), which was applied to signal post-acquisition. Datasets were  
563 epoched with respect to stimulus presentation onset (stimulus-locked trials from -0.5 to 1.0  
564 sec) and artifacts rejected using a semi-automated process outlined as follows: noisy channels  
565 were identified as having more than 20 trials exceeding 1.5pT amplitude under a temporary  
566 bandpass filter of 3 to 50 Hz, with no more than 5 channels in the sensor array removed.  
567 Epochs were then flagged and removed for any remaining artifacts exceeding the 1.5pT  
568 threshold. Mean number of trials included in analyses for the two groups did not significantly



569 differ (svPPA mean = 155 trials [std dev = 20, range 121-170], control mean = 162 [std dev = 16,  
570 range 103-172], 2-tailed  $t[34]=1.059$ ,  $p=.297$  ).

571 Alignment of structural and functional images was performed using 3 prominent  
572 anatomical points (nasion and preauricular points), marked in the individuals' MR images and  
573 localized in the MEG sensor array using the 3 fiducial coils attached to these points during the  
574 MEG scan. A 3D grid of voxels with 5mm spatial resolution covering the entire brain was  
575 created for each subject and recording, based on a multisphere head model of the coregistered  
576 structural 3D T1-weighted MR scan. Reconstruction of whole brain oscillatory activity within  
577 these voxels was performed via the Neurodynamic Utility Toolbox for MEG (NUTMEG;  
578 <http://nutmeg.berkeley.edu>), which implements a time–frequency optimized adaptive spatial  
579 filtering technique to estimate the spatiotemporal estimate of neural sources. The tomographic  
580 volume of source locations was computed using a 5 mm lead field that weights each cortical  
581 location relative to the signal of the MEG sensors (Dalal et al., 2008).

582 We sought to investigate both evoked and induced changes in brain activity, i.e. to study  
583 modulations of ongoing oscillatory processes that are not necessarily phased-locked (Makeig et  
584 al., 2004). Moreover, we wished to explore both high and low frequency ranges as they bear  
585 different functional interpretations, in particular their association with different spatial scales:  
586 high-frequency and low-frequency oscillations are associated with local and distributed  
587 computations, respectively (Donner & Siegel, 2011). Thus, we examined task-related  
588 modulations of ongoing oscillatory processes in 5 frequency bands: theta (3-7 Hz), alpha (8-12  
589 Hz), beta (12-30 Hz), low-gamma (30-55 Hz) and high-gamma (63-117 Hz) (FIR filter having  
590 widths of 300 ms for theta/alpha, 200 ms for beta, 150 ms for low-gamma, and 100 ms for high-  
591 gamma; sliding over 25 ms time windows). Source power for each voxel location in a specific  
592 time window and frequency band was derived through a noise-corrected pseudo-F statistic  
593 expressed in logarithmic units (decibels; dB), describing signal magnitude during an “active”  
594 experimental time window relative to an equivalently-sized, static pre-stimulus baseline  
595 “control” window (Robinson & Vrba, 1999). Single subject beamformer reconstructions were  
596 spatially normalized by applying each subject's T1-weighted transformation matrix to their  
597 statistical map.

598 Group analyses were performed on normalized reconstructions using statistical  
599 nonparametric mapping (SnPM, Singh et al, 2003), both within-group and between-groups.  
600 Three-dimensional average and variance maps across subjects were calculated at each time  
601 point and smoothed with a  $20 \times 20 \times 20\text{mm}^3$  Gaussian kernel (Dalal et al., 2008). From this map,  
602 pseudo-t statistics evaluated the magnitude of the contrast obtained at each voxel and time.  
603 Voxel labels were permuted to create a T-distribution map for within- and between- group  
604 contrasts ( $2^N$  permutations, where  $N$  = number of subjects, up to 10,000 permutations). Each  
605 voxel's t-value was evaluated using  $2^N$  degrees of freedom to determine the corresponding p-  
606 value associated with each voxel's pseudo-F value (Singh, Barnes, & Hillebrand, 2003). For  
607 uncorrected p-values attaining a threshold of  $p < .005$ , a cluster correction was applied,  
608 whereby cortical significance maps were thresholded, voxel-wise, under an additional  
609 requirement to have 26 adjacent significant voxels. To remove potential artifacts due to  
610 neurodegeneration or eye movement (lacking electrooculograms), we masked statistical maps  
611 using patients' ATL atrophy maps (see section MRI protocol and analyses), as well as a  
612 ventromedial frontal mask [MNI coordinates: -70 70; 5 75; -60 -10]. We utilized these to  
613 examine the pattern of activation during semantic categorization separately for controls and  
614 svPPA patients (SnPM one-sample t-test against baseline) and directly compare svPPA patients  
615 and controls to highlight spatiotemporal clusters of differential activity between the two  
616 cohorts (SnPM two-sample t-test).

617 Finally, we conducted a region-of-interest (ROI) post-hoc analysis aimed at investigating  
618 the relation between subjects' behavioral performance and neural activity. Two ROIs were  
619 centered on the main clusters resulting from the contrast svPPA patients vs. healthy controls in  
620 the gamma band (occipital lobe, coordinates: [-15 -5], [-105 -95], [-15 -5]) and in the beta band  
621 (temporal lobe, coordinates: [-70 -60], [-25 -15], [-10 0]). Single subjects' values were extracted  
622 in both ROIs in the 100ms window surrounding the peak effect (gamma-band peak: 112-212  
623 ms, beta-band peak: 237-337 ms) and correlated with the reaction times.

624

625 Data Availability

626           The clinical and neuroimaging data used in the current paper are available from the  
627 corresponding author, upon reasonable request. The sensitive nature of patients' data and our  
628 current ethics protocol do not permit open data sharing at this stage.

629

630

### 631 **Acknowledgements**

632           The authors thank the patients and their families for the time and effort they dedicated  
633 to this research.

634

635

636

### 637 **Funding**

638           This work was funded by the following National Institutes of Health grants  
639 (R01NS050915, K24DC015544, R01NS100440, R01DC013979, R01DC176960, R01DC017091,  
640 R01EB022717, R01AG062196). Additional funds include the Larry Hillblom Foundation, the  
641 Global Brain Health Institute and UCOP grant MRP-17-454755. These supporting sources were  
642 not involved in the study design, collection, analysis or interpretation of data, nor were they  
643 involved in writing the paper or the decision to submit this report for publication.

644

645

646

### 647 **Competing interests**

648           The authors declare no competing interests.

649

650

651

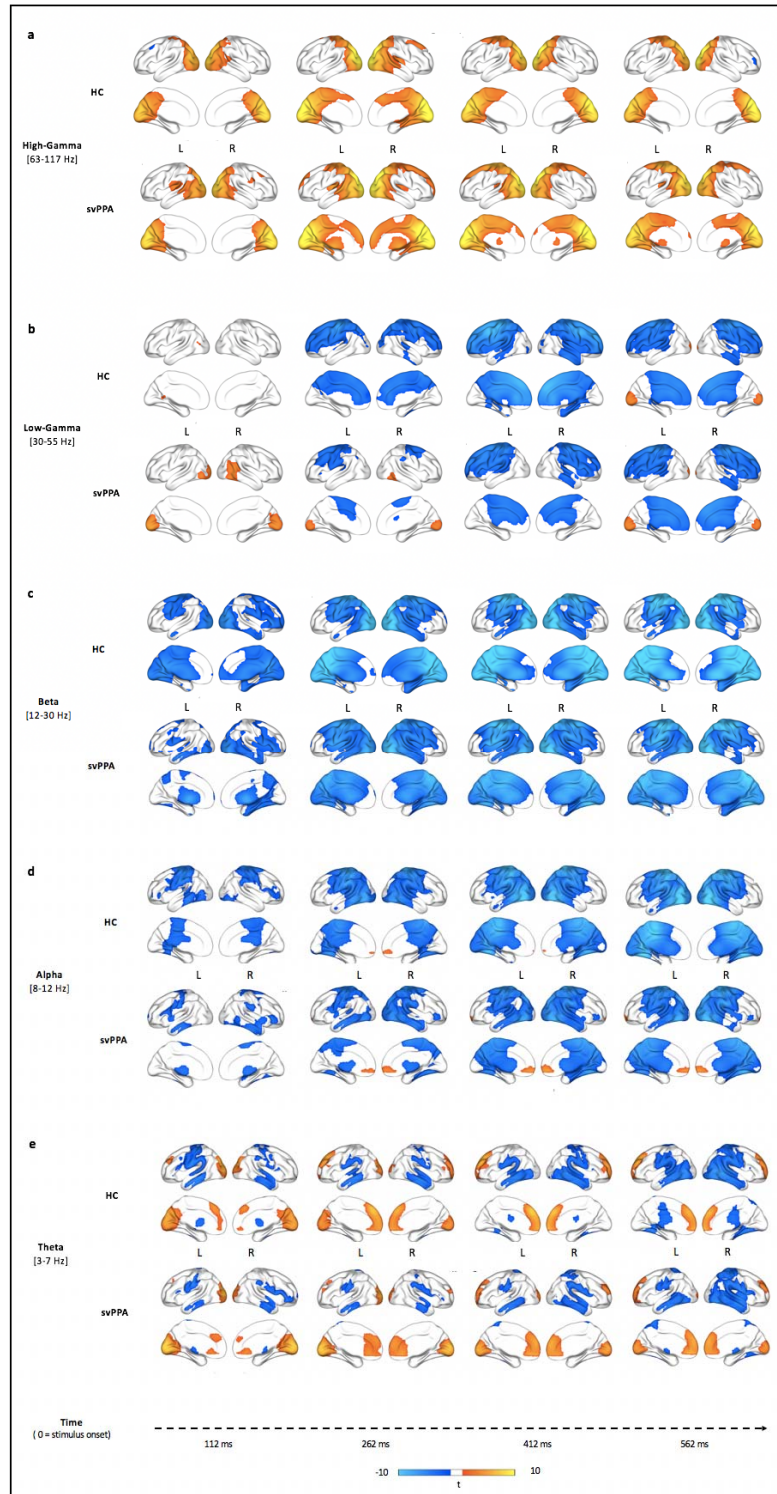

652  
653  
654  
655  
656  
657  
658  
659

**Supl. Fig. 1. Stimulus-locked (0 ms = stimulus onset) within-group analyses of task-related changes in oscillatory power. a)** Rendering of the results in the high-gamma band for both controls (HC, upper row) and patients (svPPA, lower row). Cold color = more desynchronization (vs. baseline). Warm color = more synchronization (vs. baseline). c-d) Same as in (a) but for the low-gamma, beta, alpha, and theta band respectively. For details, please see text.

660

661 **Bibliography**

662

663 Agosta, F., Galantucci, S., Valsasina, P., Canu, E., Meani, A., Marcone, A., ... Filippi, M. (2014). Disrupted  
664 brain connectome in semantic variant of primary progressive aphasia. *Neurobiology of Aging*,  
665 35(11), 2646–2655. <https://doi.org/10.1016/j.neurobiolaging.2014.05.017>

666 Bannert, M. M., & Bartels, A. (2013). Decoding the yellow of a gray banana. *Current Biology*, 23(22),  
667 2268–2272. <https://doi.org/10.1016/j.cub.2013.09.016>

668 Bar, M., Kassam, K. S., Ghuman, A. S., Boshyan, J., Schmidt, A. M., Dale, A. M., ... Halgren, E. (2006). Top-  
669 down facilitation of visual recognition. *Proceedings of the National Academy of Sciences of the*  
670 *United States of America*, 103(2), 449–454. <https://doi.org/10.1073/pnas.0507062103>

671 Bastiaansen MC, Oostenveld R, Jensen O, Hagoort P (2008) I see what you mean: theta power increases  
672 are involved in the retrieval of lexical semantic information. *Brain Lang* 106:15-28.

673 Bastiaansen MC, Van Der Linden M, Ter Keurs M, Dijkstra T, Hagoort P (2005) Theta responses are  
674 involved in lexical—Semantic retrieval during language processing. *Journal of cognitive*  
675 *neuroscience* 17:530-541

676 Battistella, G., Henry, M., Gesierich, B., Wilson, S. M., Borghesani, V., Shwe, W., ... Gorno-Tempini, M. L.  
677 (2019). Differential intrinsic functional connectivity changes in semantic variant primary  
678 progressive aphasia. *NeuroImage: Clinical*, 22(March), 101797.  
679 <https://doi.org/10.1016/j.nicl.2019.101797>

680 Benjamini, Y., & Hochberg, Y. (2000). On the Adaptive Control of the False Discovery Rate in Multiple  
681 Testing With Independent Statistics. *Journal of Educational and Behavioral Statistics*, 25(1), 60–83.  
682 <https://doi.org/10.3102/10769986025001060>

683 Binder, J. R., & Desai, R. H. (2011). The neurobiology of semantic memory. *Trends in Cognitive Sciences*,  
684 15(11), 527–536. <https://doi.org/10.1016/j.tics.2011.10.001>

685 Blundo, C., Ricci, M., & Miller, L. (2006). Category-specific knowledge deficit for animals in a patient with  
686 herpes simplex encephalitis. *Cognitive Neuropsychology*, 23(8), 1248–1268.  
687 <https://doi.org/10.1080/02643290600896449>

688 Bonakdarpour, B., Rogalski, E. J., Wang, A., Sridhar, J., Mesulam, M. M., & Hurley, R. S. (2017). Functional  
689 Connectivity is Reduced in Early-stage Primary Progressive Aphasia When Atrophy is not  
690 Prominent. *Alzheimer Disease and Associated Disorders*, 31(2), 101–106.  
691 <https://doi.org/10.1097/WAD.0000000000000193>

692 Borghesani, V., Hinkley, L.B., Ranasinghe, K., Thompson, M., Shwe, W., Mizuir, D., Honma, S., Henry,  
693 M., Houde, J.F., Miller, Z., Nagarajan, S.S., & Gorno-Tempini, M.L. (2020) Taking the sub-lexical  
694 route: the spatiotemporal dynamics of reading in semantic variant of Primary Progressive Aphasia.

695 Brain

696 Borghesani, V., Pedregosa, F., Buiatti, M., Amadon, A., Eger, E., & Piazza, M. (2016). Word meaning in  
697 the ventral visual path: a perceptual to conceptual gradient of semantic coding. *NeuroImage*, *143*,  
698 128–140. <https://doi.org/10.1016/j.neuroimage.2016.08.068>

699 Borghesani, V., & Piazza, M. (2017). The neuro-cognitive representations of symbols: the case of  
700 concrete words. *Neuropsychologia*, *105*(June), 4–17.  
701 <https://doi.org/10.1016/j.neuropsychologia.2017.06.026>

702 Bruffaerts, R., Tyler, L. K., Shafto, M., Tsvetanov, K. A., Centre, C., & Clarke, A. (2019). Perceptual and  
703 conceptual processing of visual objects across the adult lifespan, (February), 1–13.  
704 <https://doi.org/10.1038/s41598-019-50254-5>

705 Caramazza, A., & Shelton, J. R. (1998). Domain-Specific Knowledge Systems in the Brain: The Animate-  
706 Inanimate Distinction. *Journal of Cognitive Neuroscience*, *10*(1), 1–34.  
707 <https://doi.org/10.1162/089892998563752>

708 Chiou, R., Humphreys, G. F., Jung, J. Y., & Lambon Ralph, M. A. (2018). *Controlled semantic cognition*  
709 *relies upon dynamic and flexible interactions between the executive ‘semantic control’ and hub-*  
710 *and-spoke ‘semantic representation’ systems.* *Cortex* (Vol. 103). Elsevier Ltd.  
711 <https://doi.org/10.1016/j.cortex.2018.02.018>

712 Clarke, A., & Tyler, L. K. (2015). Understanding What We See: How We Derive Meaning From Vision.  
713 *Trends in Cognitive Sciences*, *19*(11), 677–687. <https://doi.org/10.1016/j.tics.2015.08.008>

714 Clarke, A., Taylor, K. I., & Tyler, L. K. (2011). The evolution of meaning: spatio-temporal dynamics of  
715 visual object recognition. *Journal of Cognitive Neuroscience*, *23*(8), 1887–1899.  
716 <https://doi.org/10.1162/jocn.2010.21544>

717 Collins, J. A., Montal, V., Hochberg, D., Quimby, M., Mandelli, M. L., Makris, N., ... Dickerson, B. C. (2016).  
718 Focal temporal pole atrophy and network degeneration in semantic variant primary progressive  
719 aphasia. *Neurology*, *86*(16), 1–15. <https://doi.org/10.1093/brain/aww313>

720 Coutanche, M. N., & Thompson-Schill, S. L. (2015). Creating concepts from converging features in human  
721 cortex. *Cerebral Cortex*, *25*(9), 2584–2593. <https://doi.org/10.1093/cercor/bhu057>

722 Dalal, S. S., Guggisberg, A. G., Edwards, E., Sekihara, K., Findlay, A. M., Canolty, R. T., ... Nagarajan, S. S.  
723 (2008). Five-dimensional neuroimaging: Localization of the time-frequency dynamics of cortical  
724 activity. *NeuroImage*, *40*(4), 1686–1700. <https://doi.org/10.1016/j.neuroimage.2008.01.023>

725 Diehl, J., Grimmer, T., Drzezga, A., Riemenschneider, M., Förstl, H., & Kurz, A. (2004). Cerebral metabolic  
726 patterns at early stages of frontotemporal dementia and semantic dementia. A PET study.  
727 *Neurobiology of Aging*, *25*(8), 1051–1056. <https://doi.org/10.1016/j.neurobiolaging.2003.10.007>

728 Donner, T. H., & Siegel, M. (2011). A framework for local cortical oscillation patterns. *Trends in cognitive*

- 729 sciences, 15(5), 191-199.
- 730 Downing, P. E., Wiggett, A. J., & Peelen, M. V. (2007). Functional Magnetic Resonance Imaging  
731 Investigation of Overlapping Lateral Occipitotemporal Activations Using Multi-Voxel Pattern  
732 Analysis. *Journal of Neuroscience*, 27(1), 226–233. [https://doi.org/10.1523/JNEUROSCI.3619-](https://doi.org/10.1523/JNEUROSCI.3619-06.2007)  
733 06.2007
- 734 Downing, P., & Kanwisher, N. (2001). A cortical area specialized for visual processing of the human body.  
735 *Journal of Vision*, 1(3). <https://doi.org/10.1167/1.3.341>
- 736 Epstein, R., & Kanwisher, N. (1998). The parahippocampal place area: A cortical representation of the  
737 local visual environment. *NeuroImage*, 7(4 PART II), 6–9. [https://doi.org/10.1016/s1053-](https://doi.org/10.1016/s1053-8119(18)31174-1)  
738 [8119\(18\)31174-1](https://doi.org/10.1016/s1053-8119(18)31174-1)
- 739 Fernandino L, Binder JR, Desai RH, Pendl SL, Humphries CJ, Gross WL, Conant LL, Seidenberg MS (2015b)  
740 Concept Representation Reflects Multimodal Abstraction: A Framework for Embodied Semantics.  
741 *Cereb Cortex* 26:2018–2034.
- 742 Folstein, M. F., Folstein, S. E., & McHugh, P. R. (1975). “Mini-mental state”: A practical method for  
743 grading the cognitive state of patients for the clinician. *Journal of Psychiatric Research*, 12(3), 189–  
744 198.
- 745 Galantucci, S., Tartaglia, M. C., Wilson, S. M., Henry, M. L., Filippi, M., Agosta, F., ... Gorno-Tempini, M. L.  
746 (2011). White matter damage in primary progressive aphasia: A diffusion tensor tractography  
747 study. *Brain*, 134(10), 3011–3029. <https://doi.org/10.1093/brain/awr099>
- 748 Gauthier, I., Tarr, M. J., Moylan, J., Skudlarski, P., Gore, J. C., & Anderson, A. W. (2000). The fusiform  
749 “face area” is part of a network that processes faces at the individual level. *Journal of Cognitive*  
750 *Neuroscience*, 12(3), 495–504. <https://doi.org/10.1162/089892900562165>
- 751 Gorno-Tempini M, Dronkers N, Rankin K, Ogar J, Phengrasamy L, Rosen H, et al. Cognition and anatomy  
752 in three variants of primary progressive aphasia. *Ann Neurol* 2004; 55: 335–46.
- 753 Gorno-tempini, M. L., Hillis, A. E., Weintraub, S., Kertesz, A., Mendez, M., Cappa, S., ... Grossman, M.  
754 (2011). Classification of primary progressive aphasia and its variants. *Neurology*, 02, 1–10.
- 755 Grill-Spector, K., & Weiner, K. S. (2014). The functional architecture of the ventral temporal cortex and  
756 its role in categorization. *Nature Reviews Neuroscience*, 15(8), 536–548.  
757 <https://doi.org/10.1038/nrn3747>
- 758 Guo, C. C., Gorno-Tempini, M. L., Gesierich, B., Henry, M., Trujillo, A., Shany-Ur, T., ... Seeley, W. W.  
759 (2013). Anterior temporal lobe degeneration produces widespread network-driven dysfunction.  
760 *Brain*, 136(10), 2979–2991. <https://doi.org/10.1093/brain/awt222>
- 761 Gwilliams, L., & King, J.-R. (2019). Recurrent Processes Emulate a Cascade of Hierarchical Decisions:  
762 Evidence from Spatio-Temporal Decoding of Human Brain Activity. *BioRxiv*, 840074.

- 763 <https://doi.org/10.1101/840074>
- 764 Hagoort P, Hald L, Bastiaansen M, Petersson KM (2004) Integration of word meaning and world  
765 knowledge in language comprehension. *Science* 304:438-441.
- 766 Hodges JR, Patterson K, Oxbury S, Funnell E. Semantic dementia. Progressive fluent aphasia with  
767 temporal lobe atrophy. *Brain* 1992; 115: 1783–806.
- 768 Hodges, J. R., & Patterson, K. (2007). Semantic dementia: a unique clinicopathological syndrome. *Lancet*  
769 *Neurology*, 6(11), 1004–1014. [https://doi.org/10.1016/S1474-4422\(07\)70266-1](https://doi.org/10.1016/S1474-4422(07)70266-1)
- 770 Hoffman, P., Evans, G. A. L., & Lambon Ralph, M. A. (2014). The anterior temporal lobes are critically  
771 involved in acquiring new conceptual knowledge: Evidence for impaired feature integration in  
772 semantic dementia. *Cortex*, 50(1), 19–31. <https://doi.org/10.1016/j.cortex.2013.10.006>
- 773 Hoffman, P., Jones, R. W., & Ralph, M. A. L. (2012). The degraded concept representation system in  
774 semantic dementia: Damage to pan-modal hub, then visual spoke. *Brain*, 135(12), 3770–3780.  
775 <https://doi.org/10.1093/brain/aws282>
- 776 Huth, A. G., Nishimoto, S., Vu, A. T., & Gallant, J. L. (2012). A Continuous Semantic Space Describes the  
777 Representation of Thousands of Object and Action Categories across the Human Brain. *Neuron*,  
778 76(6), 1210–1224. <https://doi.org/10.1016/j.neuron.2012.10.014>
- 779 Jefferies, E., & Lambon Ralph, M. A. (2006). Semantic impairment in stroke aphasia versus semantic  
780 dementia: A case-series comparison. *Brain*, 129(8), 2132–2147.  
781 <https://doi.org/10.1093/brain/awl153>
- 782 Kanwisher, N., McDermott, J., & Chun, M. M. (1997). The fusiform face area: a module in human  
783 extrastriate cortex specialized for face perception. *The Journal of Neuroscience*: *The Official*  
784 *Journal of the Society for Neuroscience*, 17(11), 4302–4311.  
785 <https://doi.org/10.1098/Rstb.2006.1934>
- 786 Kielar, A., Deschamps, T., Jokel, R., & Meltzer, J. A. (2018). Abnormal language-related oscillatory  
787 responses in primary progressive aphasia. *NeuroImage: Clinical*, 18(2017), 560–574.  
788 <https://doi.org/10.1016/j.nicl.2018.02.028>
- 789 Kielar A, Panamsky L, Links KA, Meltzer JA (2015) Localization of electrophysiological responses to  
790 semantic and syntactic anomalies in language comprehension with MEG. *Neuroimage* 105:507-  
791 524.
- 792 Kietzmann, T. C., Spoerer, C. J., Sörensen, L. K. A., Cichy, R. M., & Hauk, O. (2019). Recurrence is required  
793 to capture the representational dynamics of the human visual system.  
794 <https://doi.org/10.1073/pnas.1905544116>
- 795 Koenig, P., Smith, E. E., & Grossman, M. (2006). Semantic categorisation of novel objects in  
796 frontotemporal dementia. *Cognitive Neuropsychology*, 23(4), 541–562.



- 797 <https://doi.org/10.1080/02643290542000094>
- 798 Lacombe, J., Jolicoeur, P., Grimault, S., Pineault, J., & Joubert, S. (2015). Neural changes associated with  
799 semantic processing in healthy aging despite intact behavioral performance. *Brain and Language*,  
800 *149*, 118–127. <https://doi.org/10.1016/j.bandl.2015.07.003>
- 801 Laiacona, M., & Capitani, E. (2001). A Case of Prevailing Deficit of Nonliving Categories or a Case of  
802 Prevailing Sparing of Living Categories? *Cognitive Neuropsychology*, *18*(1), 39–70.  
803 <https://doi.org/10.1080/02643290042000035>
- 804 Laiacona, M., Capitani, E., & Caramazza, A. (2003). Category-specific Semantic Deficits do not Reflect the  
805 Sensory/Functional Organization of the Brain: A Test of the “Sensory Quality” Hypothesis.  
806 *Neurocase*, *9*(3), 221–231. <https://doi.org/10.1076/neur.9.3.221.15562>
- 807 Lambon-Ralph, M. A., Jefferies, E., Patterson, K., & Rogers, T. T. (2016). The neural and computational  
808 bases of semantic cognition. *Nature Reviews Neuroscience*, *18*(1), 42–55.  
809 <https://doi.org/10.1038/nrn.2016.150>
- 810 Lambon-Ralph, M. A., Jefferies, E., Patterson, K., & Rogers, T. T. (2017). The neural and computational  
811 bases of semantic cognition. *Nature Reviews Neuroscience*, *18*(1), 42–55.  
812 <https://doi.org/10.1038/nrn.2016.150>
- 813 Lambon-Ralph, M. A., Sage, K., Jones, R. W., & Mayberry, E. J. (2010). Coherent concepts are computed  
814 in the anterior temporal lobes. *Proceedings of the National Academy of Sciences*, *107*(6), 2717–  
815 2722. <https://doi.org/10.1073/pnas.0907307107>
- 816 Lambon Ralph, M. A., Lowe, C., & Rogers, T. T. (2007). Neural basis of category-specific semantic deficits  
817 for living things: Evidence from semantic dementia, HSVE and a neural network model. *Brain*,  
818 *130*(4), 1127–1137. <https://doi.org/10.1093/brain/awm025>
- 819 Lerner, Y., Hendler, T., Ben-Bashat, D., Harel, M., & Malach, R. (2001). A Hierarchical Axis of Object  
820 Processing Stages in the Human Visual Cortex. *Cerebral Cortex*, *11*(4), 287–297.  
821 <https://doi.org/10.1093/cercor/11.4.287>
- 822 Makeig, S., Debener, S., Onton, J., & Delorme, A. (2004). Mining event-related brain dynamics. *Trends in*  
823 *cognitive sciences*, *8*(5), 204–210.
- 824 Maguire, E. A., Kumaran, D., Hassabis, D., & Kopelman, M. D. (2010). Autobiographical memory in  
825 semantic dementia: A longitudinal fMRI study. *Neuropsychologia*, *48*(1), 123–136.  
826 <https://doi.org/10.1016/j.neuropsychologia.2009.08.020>
- 827 Mandelli, M. L., Caverzasi, E., Binney, R. J., Henry, M. L., Lobach, I., Block, N., ... Gorno-Tempini, M. L.  
828 (2014). Frontal white matter tracts sustaining speech production in primary progressive aphasia.  
829 *Journal of Neuroscience*, *34*(29), 9754–9767. <https://doi.org/10.1523/JNEUROSCI.3464-13.2014>
- 830 Martin, A., & Chao, L. (2001). Semantic memory and the brain: structure and processes. *Current*

- 831 *Opinions in Neurobiology*, 11, 194–201.
- 832 Montembeault, M., Chapleau, M., Jarret, J., Boukadi, M., Laforce, R., Wilson, M. A., ... Brambati, S. M.  
833 (2019). Differential language network functional connectivity alterations in Alzheimer's disease and  
834 the semantic variant of primary progressive aphasia. *Cortex*, 117, 284–298.  
835 <https://doi.org/10.1016/j.cortex.2019.03.018>
- 836 Moss, H. E., Rodd, J. M., Stamatakis, E. A., Bright, P., & Tyler, L. K. (2005). Anteromedial temporal cortex  
837 supports fine-grained differentiation among objects. *Cerebral Cortex*, 15(5), 616–627.  
838 <https://doi.org/10.1093/cercor/bhh163>
- 839 Mummery, C. J., Patterson, K., Wise, R. J. S., Vandenberg, R., Price, C. J., & Hodges, J. R. (1999).  
840 Disrupted temporal lobe connections in semantic dementia. *Brain*, 122(1), 61–73.  
841 <https://doi.org/10.1093/brain/122.1.61>
- 842 Peelen, M. V., & Caramazza, A. (2012). Conceptual object representations in human anterior temporal  
843 cortex. *The Journal of Neuroscience*, 32(45), 15728–15736.  
844 <https://doi.org/10.1523/JNEUROSCI.1953-12.2012>
- 845 Pietrini, V., Nertempi, P., Vaglia, A., Revello, M. G., Pinna, V., & Ferro-Milone, F. (1988). Recovery from  
846 herpes simplex encephalitis: Selective impairment of specific semantic categories with  
847 neuroradiological correlation. *Journal of Neurology, Neurosurgery & Psychiatry*, 51, 1284–1293.  
848 <https://doi.org/10.1136/jnnp.51.10.1284>
- 849 Pineault, J., Jolicœur, P., Grimault, S., Lacombe, J., Brambati, S. M., Bier, N., ... Meg, A. (2019). A MEG  
850 study of the neural substrates of semantic processing in semantic variant primary progressive  
851 aphasia. *Neurocase*, 25(3–4), 118–129. <https://doi.org/10.1080/13554794.2019.1631853>
- 852 Price, C. J., Crinion, J., & Friston, K. J. (2006). Design and Analysis of fMRI Studies With Neurologically  
853 Impaired Patients, 826, 816–826. <https://doi.org/10.1002/jmri.20580>
- 854 Price, C. J., & Friston, K. J. (2002). Degeneracy and cognitive anatomy. *Trends in Cognitive Sciences*,  
855 6(10), 416–421.
- 856 Ranasinghe, K. G., Hinkley, L. B., Beagle, A. J., Mizuiru, D., Honma, S. M., Welch, A. E., ... Nagarajan, S. S.  
857 (2017). Distinct spatiotemporal patterns of neuronal functional connectivity in primary progressive  
858 aphasia variants. *Brain*, 140(10), 2737–2751. <https://doi.org/10.1093/brain/awx217>
- 859 Robinson, S., & Vrba, J. (1999). Functional neuroimaging by synthetic aperture magnetometry (SAM). In  
860 Yoshimoto (Ed.), *Recent advances in biomagnetism* (pp. 302–305). Sendai, Japan: Tohoku  
861 University.
- 862 Sacchett, C., & Humphreys, G. W. (1992). Calling a squirrel a squirrel but a canoe a wigwam: a category-  
863 specific deficit for artefactual objects and body parts. *Cognitive Neuropsychology*, 9(1), 73–86.  
864 <https://doi.org/10.1080/02643299208252053>

- 865 Sami, S., Williams, N., Hughes, L. E., Cope, T. E., Rittman, T., Coyle-Gilchrist, I. T. S., ... Rowe, J. B. (2018).  
866 Neurophysiological signatures of Alzheimer's disease and frontotemporal lobar degeneration:  
867 Pathology versus phenotype. *Brain*, *141*(8), 2500–2510. <https://doi.org/10.1093/brain/awy180>
- 868 Sartori, G., Job, R., Miozzo, M., Zago, S., & Marchiori, G. (1993). Category-specific form-knowledge  
869 deficit in a patient with herpes simplex virus encephalitis. *Journal of Clinical and Experimental*  
870 *Neuropsychology*, *15*(August 2015), 280–299. <https://doi.org/10.1080/01688639308402563>
- 871 Singh, K. D., Barnes, G. R., & Hillebrand, A. (2003). Group imaging of task-related changes in cortical  
872 synchronisation using nonparametric permutation testing. *NeuroImage*, *19*(4), 1589–1601.  
873 [https://doi.org/10.1016/S1053-8119\(03\)00249-0](https://doi.org/10.1016/S1053-8119(03)00249-0)
- 874 Thorat, S., Proklova, D., & Peelen, M. V. (2019). The nature of the animacy organization in human ventral  
875 temporal cortex, 1–18. Retrieved from <http://arxiv.org/abs/1904.02866>
- 876 van Ackeren MJ, Schneider TR, Musch K, Rueschemeyer SA (2014) Oscillatory neuronal activity reflects  
877 lexical-semantic feature integration within and across sensory modalities in distributed cortical  
878 networks. *The Journal of neuroscience : the official journal of the Society for Neuroscience*  
879 *34*:14318-14323
- 880 Viard, A., Desgranges, B., Matuszewski, V., Lebreton, K., Belliard, S., De La Sayette, V., ... Piolino, P.  
881 (2013). Autobiographical memory in semantic dementia: New insights from two patients using  
882 fMRI. *Neuropsychologia*, *51*(13), 2620–2632.  
883 <https://doi.org/10.1016/j.neuropsychologia.2013.08.007>
- 884 Viard, A., Piolino, P., Belliard, S., De La Sayette, V., Desgranges, B., & Eustache, F. (2014). Episodic future  
885 thinking in semantic dementia: A cognitive and fMRI Study. *PLoS ONE*, *9*(10).  
886 <https://doi.org/10.1371/journal.pone.0111046>
- 887 Warrington, E. K., & Shallice, T. (1984). Category Specific Semantic Impairments. *Brain*, *107*(3), 829–853.  
888 <https://doi.org/10.1093/brain/107.3.829>
- 889 Wilson, S. M., Brambati, S. M., Henry, R. G., Handwerker, D. A., Agosta, F., Miller, B. L., ... Gorno-Tempini,  
890 M. L. (2009). The neural basis of surface dyslexia in semantic dementia. *Brain*, *132*(1), 71–86.  
891 <https://doi.org/10.1093/brain/awn300>
- 892 Wilson, S., Yen, M., & Eriksson, D. (2018). An adaptive semantic matching paradigm for reliable and valid  
893 language mapping in individuals with aphasia, (February). <https://doi.org/10.1002/hbm.24077>
